# Supplementary material
Source: PubMed Central journal article supplement (PMC11104880)
Supplement: 18_2019_3309_MOESM2_ESM.pdf [file 18_2019_3309_MOESM2_ESM.pdf]

**A**

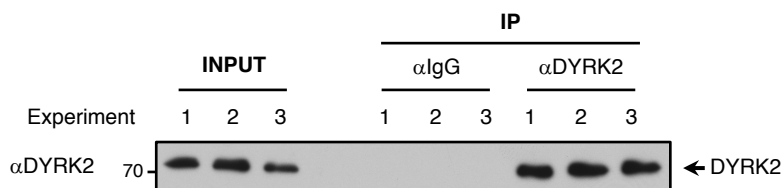

| Representative Accession | Name                                                                                            | Control IGs |          | Unused ProtScore | Total ProtScore | Confident Peptides | %Seq Cov - peptides >95% conf |
|--------------------------|-------------------------------------------------------------------------------------------------|-------------|----------|------------------|-----------------|--------------------|-------------------------------|
|                          |                                                                                                 | Peptides    | Peptides |                  |                 |                    |                               |
| spiQ92630IDYRK2_HUMAN    | Dual specificity tyrosine-phosphorylation-regulated kinase 2 OS=Homo sapiens GN=DYRK2 PE=1 SV=3 | 0 0 0       | 18 8 11  | 28,06            | 28,08           | 18                 | 32,4                          |
| spiP46531INOTC1_HUMAN    | Neurogenic locus notch homolog protein 1 OS=Homo sapiens GN=NOTCH1 PE=1 SV=4                    | 0 0 0       | 11 10 11 | 14,60            | 25,07           | 12                 | 33,1                          |
| spiQ04721INOTC2_HUMAN    | Neurogenic locus notch homolog protein 2 OS=Homo sapiens GN=NOTCH2 PE=1 SV=3                    | 0 0 0       | 22 44 19 | 54,31            | 54,31           | 44                 | 23,3                          |
| spiQ9UM47INOTC3_HUMAN    | Neurogenic locus notch homolog protein 3 OS=Homo sapiens GN=NOTCH3 PE=1 SV=2                    | 0 0 0       | 13 8 9   | 21,95            | 21,99           | 13                 | 6,1                           |

**Q92630 - DYRK2\_HUMAN**

| Residue | b        | b+2     | y        | y+2     |
|---------|----------|---------|----------|---------|
| I       | 1140915  | 875493  | 1307705  | 854386  |
| T       | 3191292  | 108373  | 11948219 | 1812142 |
| E       | 2441888  | 1725844 | 18855735 | 5472964 |
| S       | 4352936  | 2161105 | 8645701  | 4827891 |
| T       | 5323263  | 2684243 | 8774889  | 4382531 |
| G       | 6092921  | 2361440 | 7764912  | 3887293 |
| A       | 8002988  | 3304638 | 7761096  | 3887195 |
| I       | 7734848  | 3872556 | 8463927  | 3267000 |
| T       | 8744818  | 4377266 | 5363886  | 2881678 |
| S       | 9514837  | 4812468 | 4342889  | 2175841 |
| L       | 10149877 | 5373176 | 2842889  | 1761191 |
| S       | 10518881 | 5812026 | 2841666  | 1157829 |
| K       | 12094847 | 6453810 | 1471103  | 7616000 |

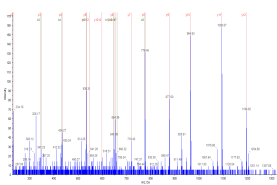

**P46531 - NOTC1\_HUMAN**

| Residue | b        | b+2      | y       | y+2      |
|---------|----------|----------|---------|----------|
| G       | 814887   | 281088   | 2681447 | 1281708  |
| T       | 1591954  | 892810   | 2681242 | 1284587  |
| G       | 2821266  | 1440711  | 2487378 | 1294341  |
| D       | 3384486  | 1724810  | 2276175 | 11402028 |
| V       | 4432249  | 2221161  | 2221866 | 11118019 |
| H       | 5602096  | 2395468  | 2122031 | 10613877 |
| C[CAH]  | 5803884  | 2704609  | 1868183 | 8614382  |
| E       | 5883078  | 4381822  | 1828438 | 8134239  |
| T       | 6624683  | 4917242  | 1688748 | 8483618  |
| N       | 10164643 | 6483488  | 1837113 | 7923006  |
| V       | 11164624 | 6882788  | 1489489 | 7383381  |
| D       | 13124584 | 6663173  | 1828886 | 8683006  |
| D       | 14454641 | 7133868  | 1485878 | 6282904  |
| C[CAH]  | 16858379 | 7833281  | 1140248 | 6767789  |
| N       | 18093808 | 8924149  | 1848986 | 8487851  |
| P       | 17987227 | 8888700  | 8664730 | 4337480  |
| D       | 18037684 | 9472883  | 1082588 | 2882878  |
| V       | 19022628 | 9883026  | 8723818 | 2884814  |
| D       | 21074883 | 10844445 | 3732891 | 2881838  |
| P       | 22044028 | 11823174 | 1868228 | 2281087  |
| V       | 22044028 | 11823174 | 3812184 | 1811133  |
| S       | 22818246 | 11892028 | 2821838 | 1318791  |
| K       | 28471281 | 12744212 | 1781190 | 881831   |

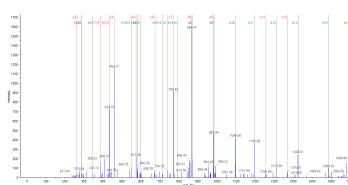

**Q04721 - NOTC2\_HUMAN**

| Residue | b        | b+2     | y        | y+2     |
|---------|----------|---------|----------|---------|
| C[CAH]  | 1611079  | 810238  | 1652844  | 828388  |
| P       | 2581887  | 1295480 | 1482839  | 7483358 |
| E       | 3814263  | 1940703 | 13958110 | 6983389 |
| G       | 4841447  | 2228810 | 1288584  | 6337819 |
| F       | 5842252  | 2961182 | 12095471 | 6882771 |
| L       | 7843872  | 3828872 | 18824785 | 6347428 |
| G       | 7843887  | 3811800 | 8463845  | 4782088 |
| E       | 8863783  | 4468883 | 8823738  | 4488801 |
| T       | 93534286 | 5272219 | 7633384  | 3821888 |
| C[CAH]  | 12144643 | 6072383 | 8083871  | 3888822 |
| Q       | 13415238 | 6713889 | 4482384  | 2282181 |
| H       | 14788827 | 7387880 | 3124778  | 1883882 |
| R       | 16348858 | 8178468 | 1781180  | 881831  |

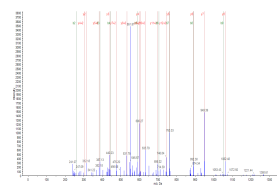

**Q9UM47 - NOTC3\_HUMAN**

| Residue | b        | b+2     | y       | y+2     |
|---------|----------|---------|---------|---------|
| C[CAH]  | 1611079  | 810238  | 1652844 | 828388  |
| E       | 2581887  | 1295480 | 1482839 | 7483358 |
| A       | 3814178  | 1910252 | 1323883 | 6823388 |
| P       | 4811704  | 2295888 | 1882478 | 6388828 |
| A       | 5882098  | 2881272 | 1188388 | 8182887 |
| A       | 6882488  | 3883019 | 1088288 | 5427871 |
| A       | 8712817  | 3381448 | 9154888 | 6872488 |
| P       | 7882348  | 3840709 | 8488827 | 4717900 |
| E       | 8872711  | 4481882 | 8483888 | 4333888 |
| V       | 9884448  | 4887284 | 7183871 | 3888823 |
| S       | 10834778 | 5422424 | 8172888 | 3881481 |
| E       | 11724828 | 6083827 | 6881888 | 2888823 |
| E       | 13418827 | 6783888 | 6882482 | 2881188 |
| P       | 14381868 | 7188114 | 2784771 | 1385888 |
| R       | 16847188 | 7878819 | 1781180 | 881831  |

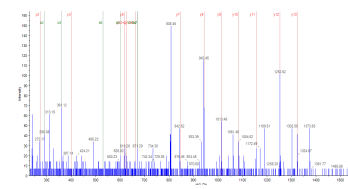

**B**

| Myc-Notch1-IC | + | + | + | + | + | + |
|---------------|---|---|---|---|---|---|
| HA-DYRK1A     | - | + | - | - | - | - |
| HA-DYRK1B     | - | - | + | - | - | - |
| HA-DYRK2      | - | - | - | + | - | - |
| HA-DYRK3      | - | - | - | - | + | - |
| HA-DYRK4      | - | - | - | - | - | + |

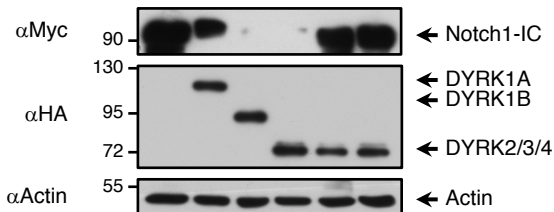

**C**

| Myc-Notch1-IC  | + | + | - | - | - | - | - |
|----------------|---|---|---|---|---|---|---|
| Flag-Notch2-IC | - | - | + | + | - | - | - |
| HA-Notch3-IC   | - | - | - | - | + | + | - |
| Flag-Notch4-IC | - | - | - | - | - | + | + |
| Flag-DYRK2     | - | + | - | + | - | + | + |

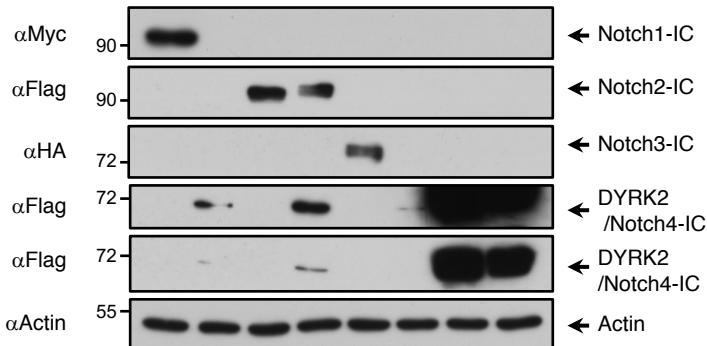

Fig. S1

**D**

|           |   |   |   |   |   |
|-----------|---|---|---|---|---|
| HA-DYRK1A | - | + | - | - | - |
| HA-DYRK1B | - | - | + | - | - |
| HA-DYRK2  | - | - | - | + | - |
| HA-DYRK3  | - | - | - | - | + |
| HA-DYRK4  | - | - | - | - | + |

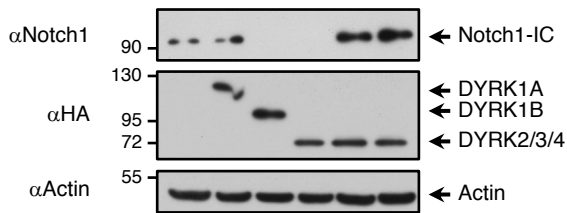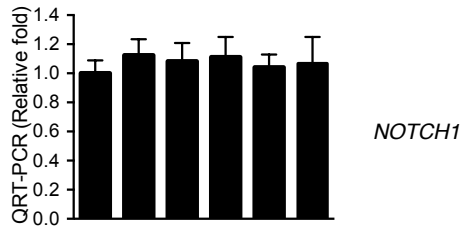**F**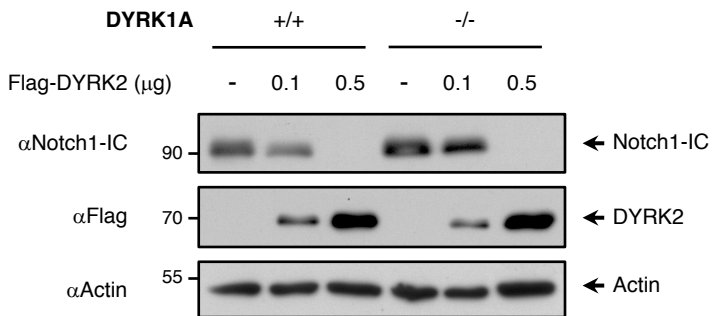**E**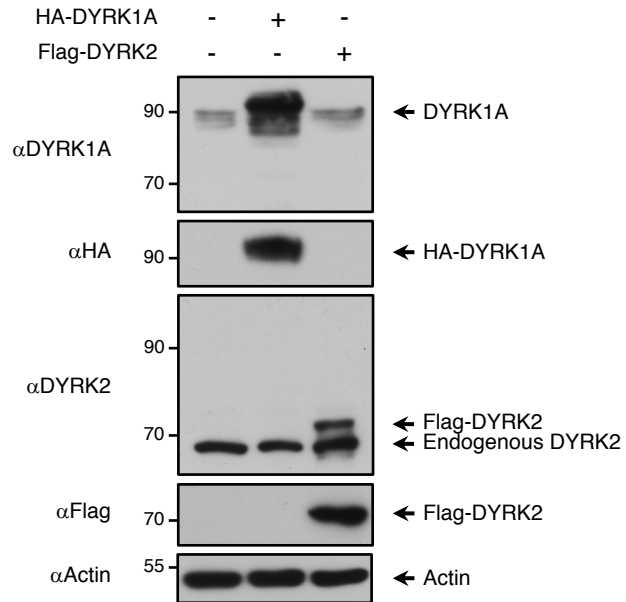**G**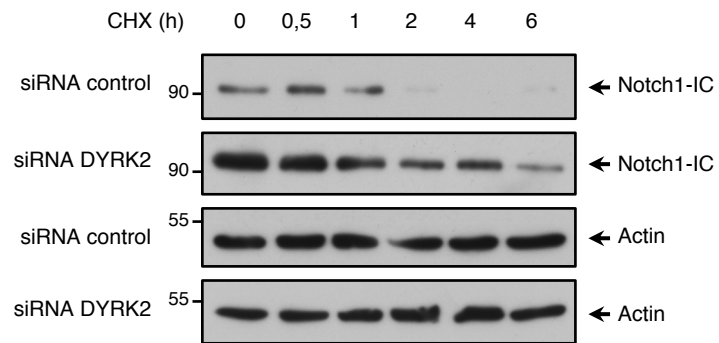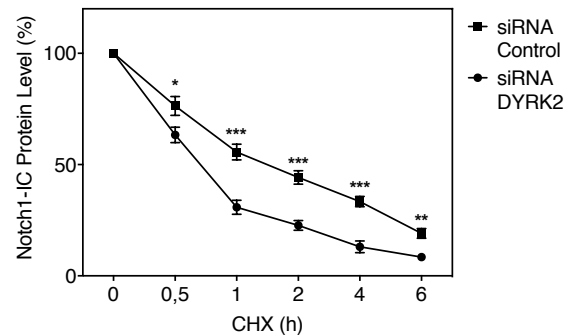

**A**

|                          |   |     |     |     |     |
|--------------------------|---|-----|-----|-----|-----|
| Flag-DYRK2 WT ( $\mu$ g) | - | 0.1 | 0.2 | 0.2 | -   |
| Flag-DYRK2 KM ( $\mu$ g) | - | -   | -   | -   | 0.1 |
| Harmine                  | - | -   | -   | +   | -   |

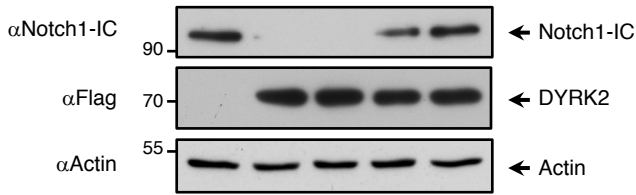**B**

|               |   |         |   |          |   |
|---------------|---|---------|---|----------|---|
|               |   | Harmine |   | Curcumin |   |
| Myc-Notch1-IC | + | +       | + | +        | + |
| Flag-DYRK2 WT | - | +       | + | +        | - |
| Flag-DYRK2 KM | - | -       | - | -        | + |

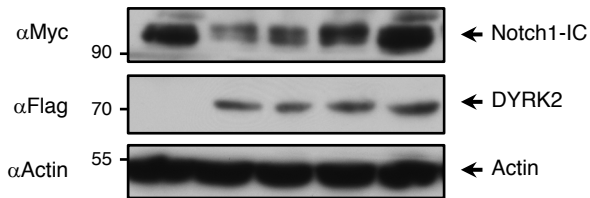**C**

|              |        |   |        |   |        |   |        |   |
|--------------|--------|---|--------|---|--------|---|--------|---|
|              | T2133A |   | T2467A |   | T2484A |   | T2512A |   |
| HA-Notch1-IC | +      | + | +      | + | +      | + | +      | + |
| Flag-DYRK2   | -      | + | -      | + | -      | + | -      | + |

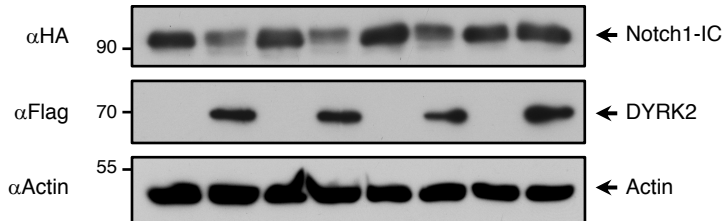

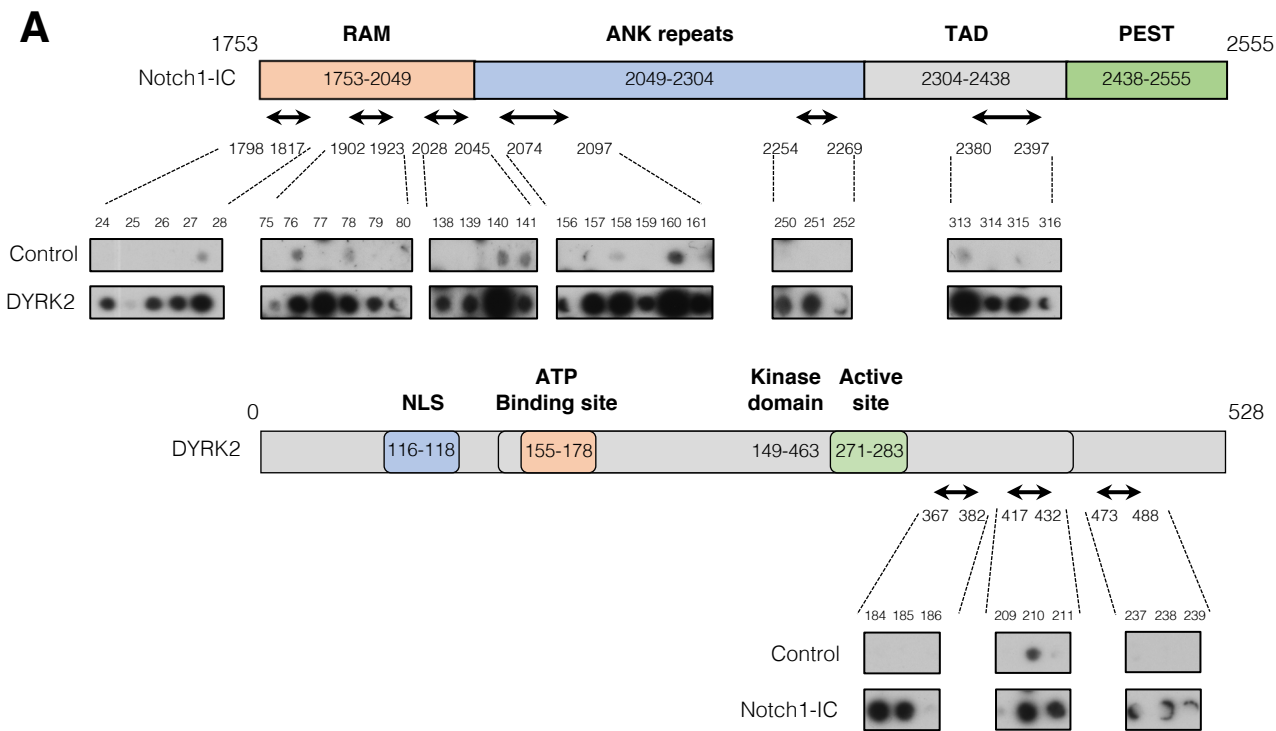

**B**

**Notch-IC**

|       |               |
|-------|---------------|
| 24    | KNASDGALMDDN  |
| 25    | ASDGALMDDNQN  |
| 26    | DGALMDDNQN EW |
| 27    | ALMDDNQN EWGD |
| 28    | MDDNQN EWGDED |
| ----- |               |
| 75    | EEEDAPAVISDF  |
| 76    | EDAPAVISDFIY  |
| 77    | APAVISDFIYQG  |
| 78    | AVISDFIYQGAS  |
| 79    | ISDFIYQGASLH  |
| 80    | DFIYQGASLHNQ  |
| ----- |               |
| 138   | GKSALHWAAAVN  |
| 139   | SALHWAAAVNNV  |
| 140   | LHWAAAVNNVDA  |
| 141   | WAAAVNNVDAAV  |
| ----- |               |
| 156   | YETAKVLLDHFA  |
| 157   | TAKVLLDHFANR  |
| 158   | KVLLDHFANRDI  |
| 159   | LLDHFANRDITD  |
| 160   | DHFANRDITDHM  |
| 161   | FANRDITDHMDR  |
| 162   | NRDITDHMDRLP  |
| ----- |               |
| 250   | EMAALGGGGRLA  |
| 251   | AALGGGGRLAFE  |
| 252   | LGGGGRLAFETG  |
| ----- |               |
| 313   | VQTQQVQPQN LQ |
| 314   | TQQVQPQN LQMQ |
| 315   | QVQPQN LQMQQQ |
| 316   | QPQN LQMQQQNL |

**DYRK2**

|       |              |
|-------|--------------|
| 184   | MPSQKLLDASKR |
| 185   | SQKLLDASKRAK |
| 186   | KLLDASKRAKNF |
| ----- |              |
| 209   | PPESREWGNALK |
| 210   | ESREWGNALKGC |
| 211   | REWGNALKGCDD |
| ----- |              |
| 237   | EKTSVKRITEST |
| 238   | TSVKRITESTGA |
| 239   | VKRITESTGAIT |

Fig. S4



**C**

|                        |                                   |        |  |
|------------------------|-----------------------------------|--------|--|
|                        | 1798                              | 1817   |  |
| <b>HA-Notch1-RAM1:</b> | KNASDGALMDDNQNEWGDED              | WT     |  |
|                        | KNASDGAL <b>AAA</b> NQNEWGDED     | Mutant |  |
|                        | 1902                              | 1923   |  |
| <b>HA-Notch1-RAM2:</b> | EEEDAPAVISDFIYQGASLHNQ            | WT     |  |
|                        | EEEDAPAVI <b>AAA</b> IYQGASLHNQ   | Mutant |  |
|                        | 2028                              | 2045   |  |
| <b>HA-Notch1-RAM3:</b> | GKSALHWAAAVNNVDAAV                | WT     |  |
|                        | GKSALHWAA <b>KEA</b> NVDAAV       | Mutant |  |
|                        | 2074                              | 2097   |  |
| <b>HA-Notch1-ANK1:</b> | YETAKVLLDHFANRDITDHMDRLP          | WT     |  |
|                        | YETAKVLL <b>AAA</b> ANRDITDHMDRLP | Mutant |  |
|                        | 2254                              | 2269   |  |
| <b>HA-Notch1-ANK2:</b> | EMAALGGGGRLAFETG                  | WT     |  |
|                        | EMAALG <b>AAA</b> RLAFETG         | Mutant |  |
|                        | 2380                              | 2397   |  |
| <b>HA-Notch1-TAD1:</b> | VQTQQVQPQNLQMQQQNL                | WT     |  |
|                        | VQTQQVQ <b>AAA</b> LQMQQQNL       | Mutant |  |

**D**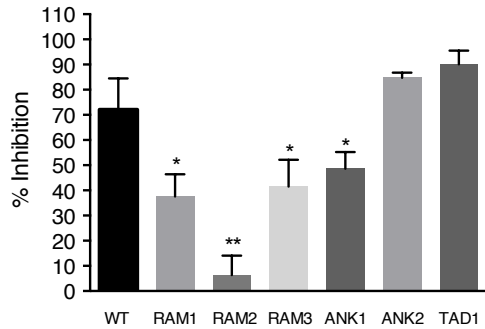

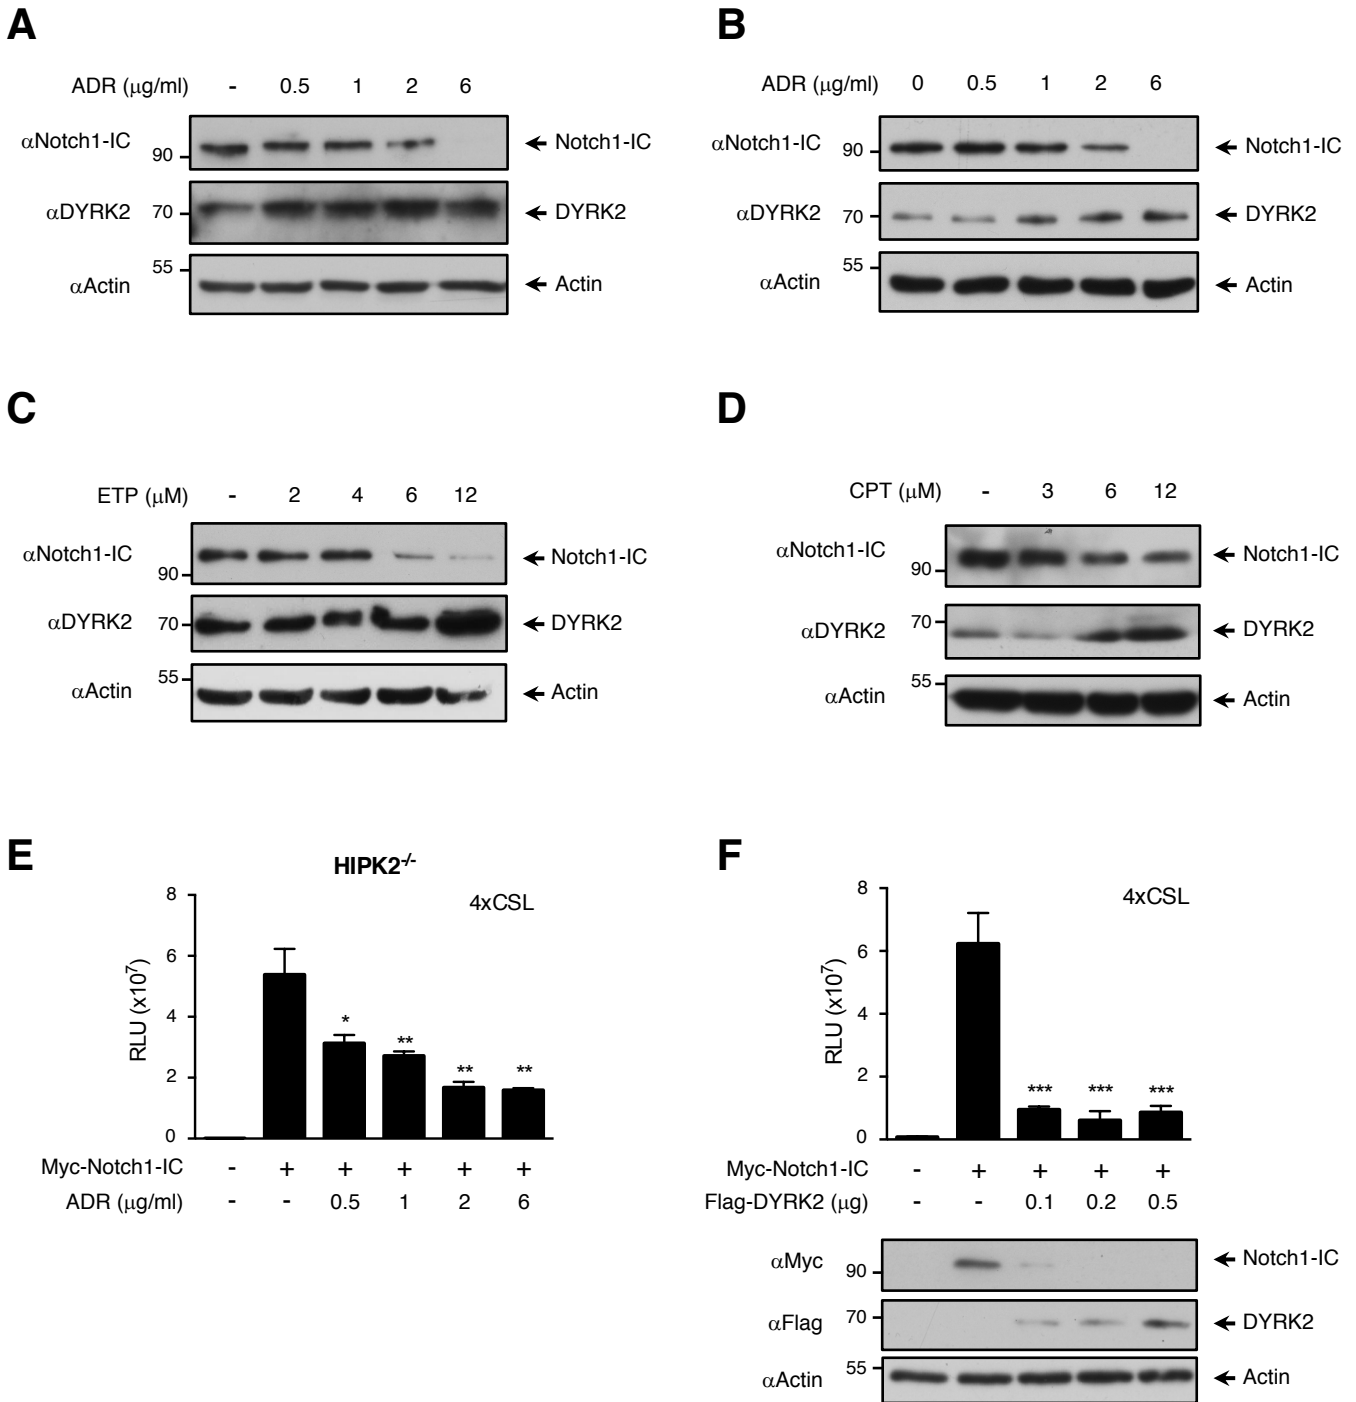

Fig. S5

**G**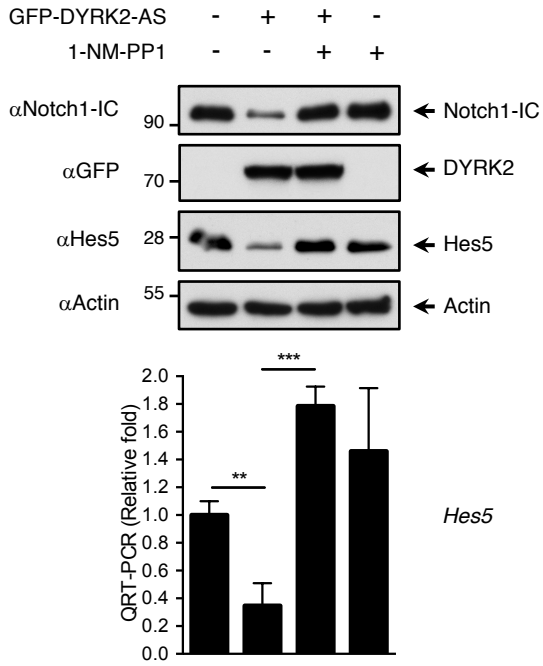**H**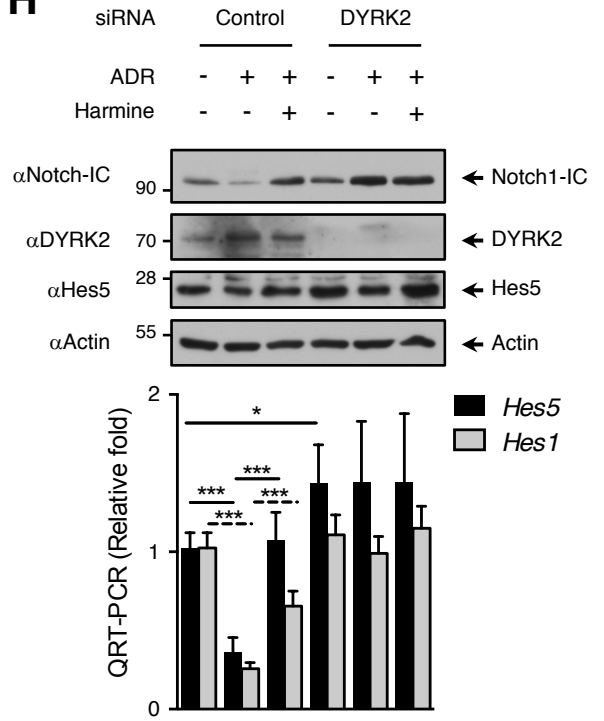**I**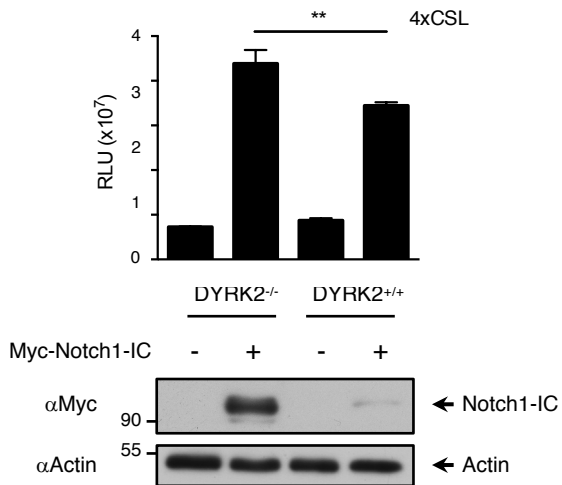

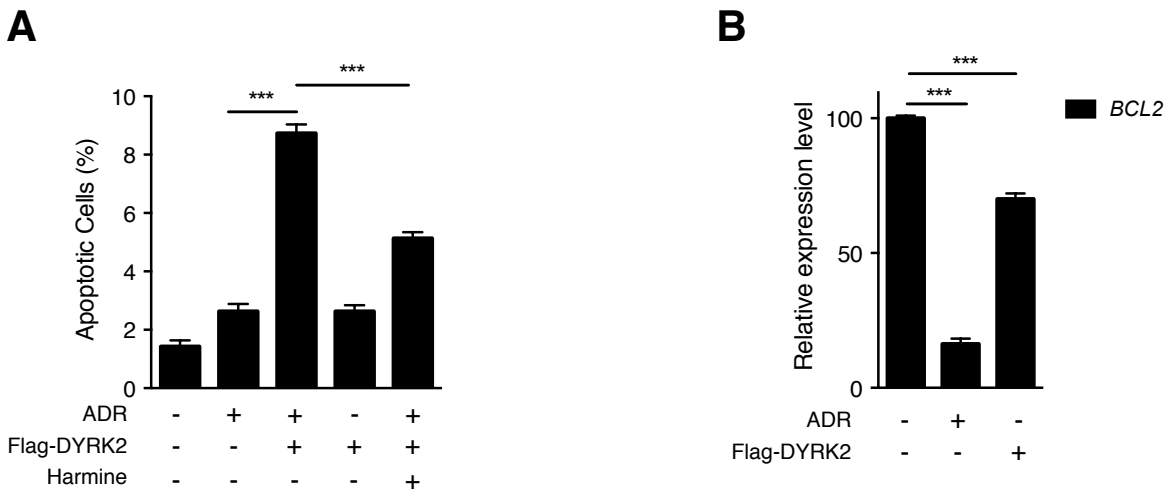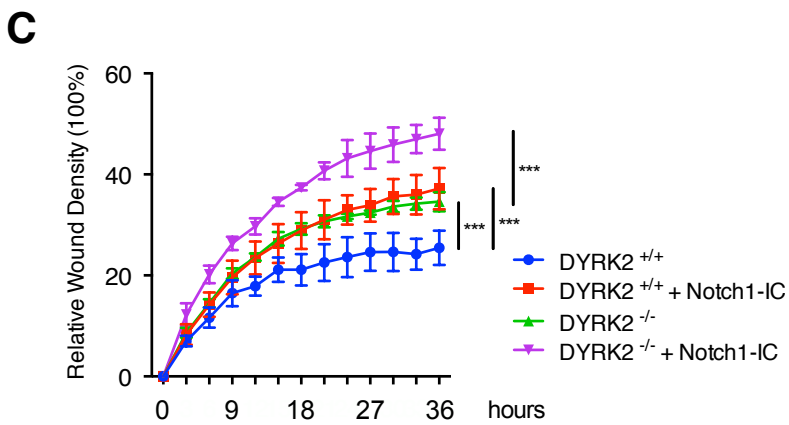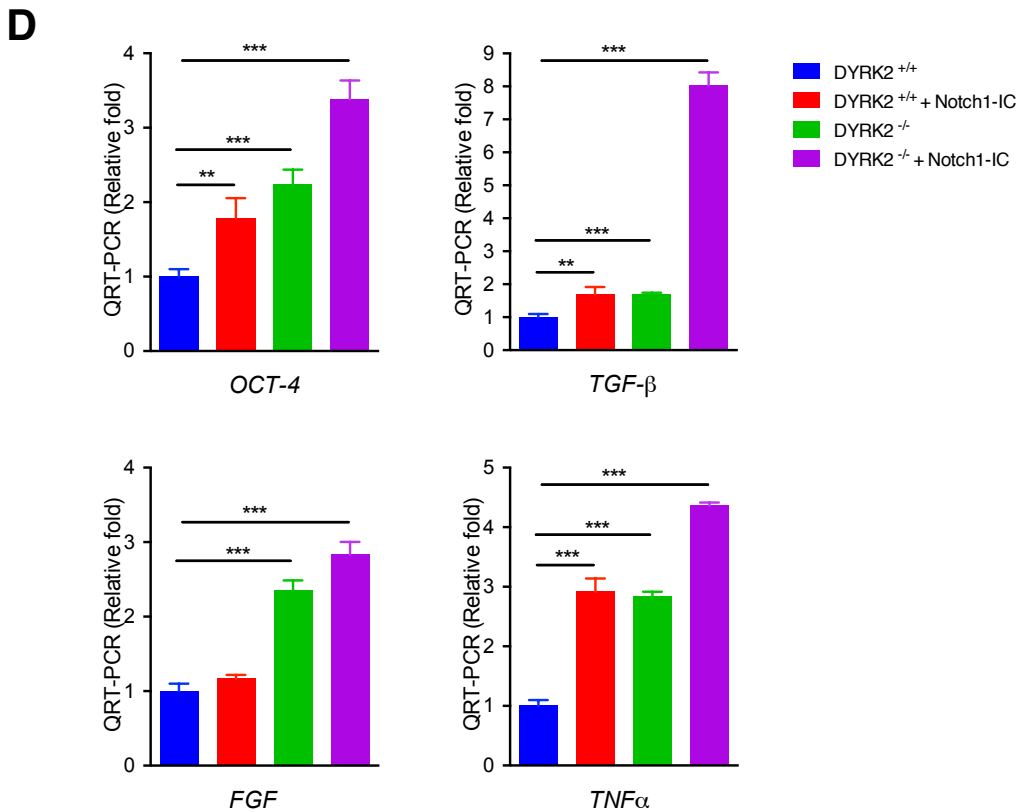

Fig. S6
